# Supplementary material for: Pharmacokinetics and Dialyzability of a Single Oral Dose of Amenamevir, an Anti-Herpes Drug, in Hemodialysis Patients
Source: Springer Nature journal article supplement (doi:10.1007/s12325-020-01375-1), 2020-05-21
Supplement: MOESM1 [file 18003346]

## **SUPPLEMENTAL MATERIAL**

### **Pharmacokinetics and dialyzability of a single oral dose of amenamevir, an anti-herpes drug in hemodialysis patients**

Shuichi Tsuruoka<sup>1</sup>, Takamasa Endo<sup>2</sup>, Mizuna Seo<sup>2</sup>, Naoto Hashimoto<sup>3</sup>

<sup>1</sup> *Department of Nephrology, Nippon Medical School, Tokyo, Japan*

<sup>2</sup> *Clinical Development Department, Maruho Co., Ltd., Kyoto, Japan*

<sup>3</sup> *Drug Development Research Laboratory, Maruho Co., Ltd., Kyoto, Japan*

**Supplemental Table S1** List of the principal investigators and institutional review boards

**Supplemental Figure S1** Correlation between; (A) hemodialysis clearance of amenamevir (mL/min/m<sup>2</sup>) and normalized dialysis dose, (B) hemodialysis clearance of amenamevir (mL/min/m<sup>2</sup>) and serum albumin (g/dL), (C) elimination fraction of amenamevir (%) and normalized dialysis dose, (D) elimination fraction of amenamevir (%) and serum albumin (g/dL), (E) amount removed of amenamevir (μg) and normalized dialysis dose, (F) amount removed of amenamevir (μg) and serum albumin (g/dL)

**Supplemental Figure S2** Correlation between; (A) hemodialysis clearance of R5 (mL/min/m<sup>2</sup>) and normalized dialysis dose, (B) hemodialysis clearance of R5 (mL/min/m<sup>2</sup>) and serum albumin (g/dL), (C) elimination fraction of R5 (%) and normalized dialysis dose, (D) elimination fraction of R5 (%) and serum albumin (g/dL),

(E) amount removed of R5 ( $\mu\text{g}$ ) and normalized dialysis dose, (F) amount removed of R5 ( $\mu\text{g}$ ) and serum albumin ( $\text{g/dL}$ )

**Supplemental Table S1 List of the principal investigators and institutional review boards**

| Principal investigator | Institution                                                                                         | Institutional review board                                                              | Reference number |
|------------------------|-----------------------------------------------------------------------------------------------------|-----------------------------------------------------------------------------------------|------------------|
| Tomomasa Oguchi        | Aizawa Hospital, Matsumoto, Nagano, Japan                                                           | Institutional Review Board of Aizawa Hospital                                           | —                |
| Tadashi Iitsuka        | Ibaraki Seinan Medical Center Hospital, Sakaimachi, Ibaraki, Japan                                  | Review Board of Human Rights and Ethics for Clinical Studies Institutional Review Board | 2018052          |
| Tokuro Kobayashi       | Moriya Keiyu Hospital, Moriya, Ibaraki, Japan                                                       | Review Board of Human Rights and Ethics for Clinical Studies Institutional Review Board | 2018052          |
| Takashi Udagawa        | Nippon Koukan Hospital, Kawasaki, Kanagawa, Japan                                                   | Institutional Review Board of Nippon Koukan Hospital                                    | —                |
| Katsushige Abe         | Jinikai Hospital, Oita, Oita, Japan                                                                 | Nihonbashi Sakura Clinic Institutional Review Board                                     | —                |
| Hidetoshi Yoshinaga    | Social Medical Corporation the Chiyukai Foundation Fukuoka Wajiro Hospital, Fukuoka, Fukuoka, Japan | Nihonbashi Sakura Clinic Institutional Review Board                                     | —                |

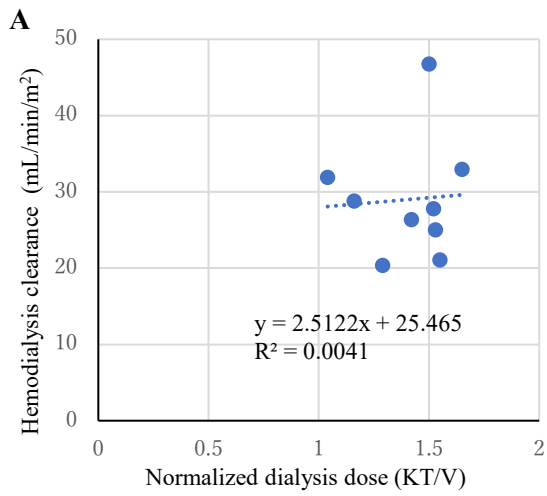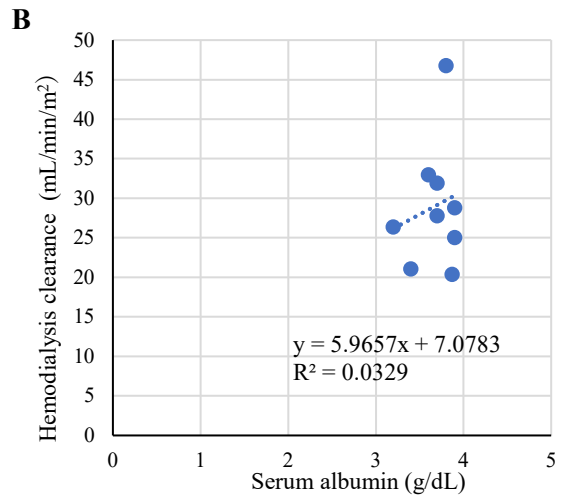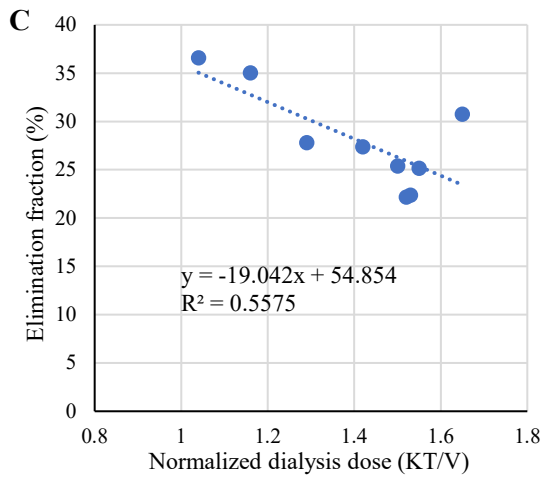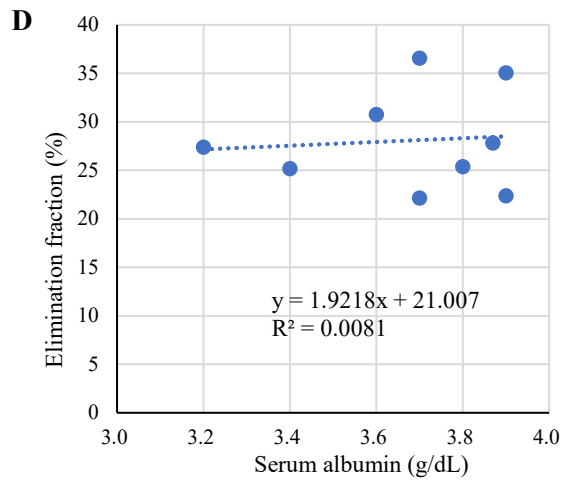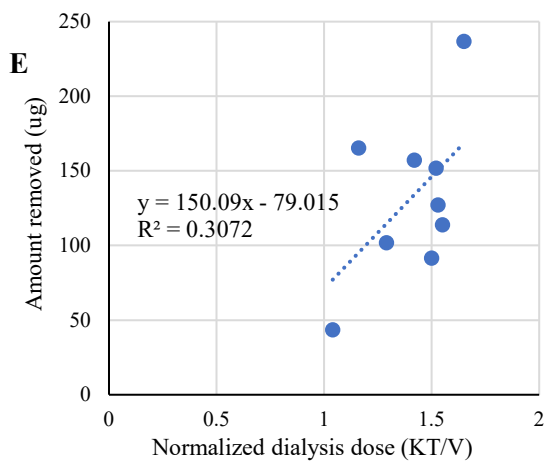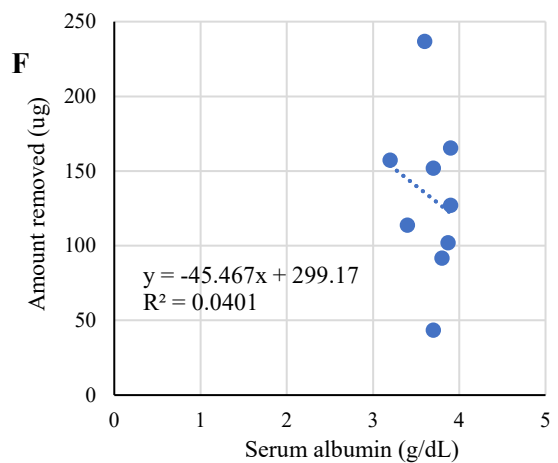

**Supplemental Figure S1**

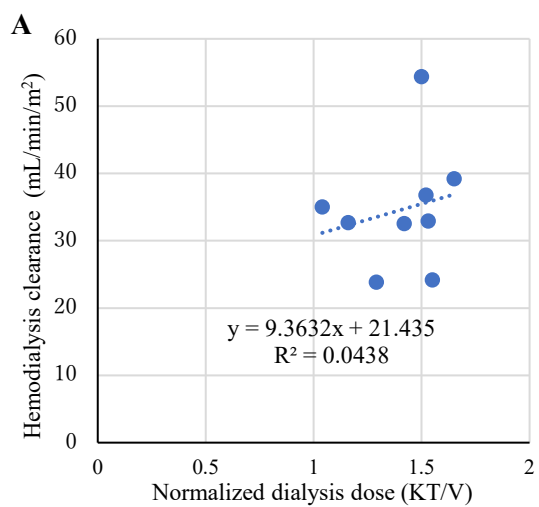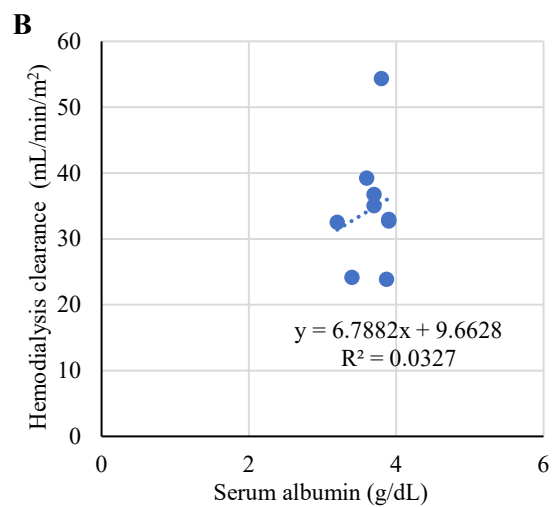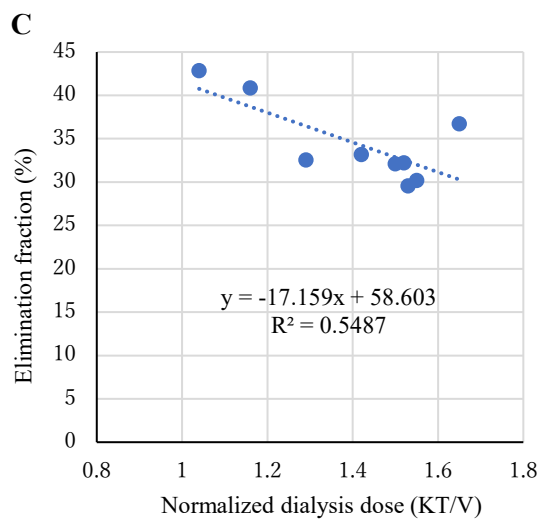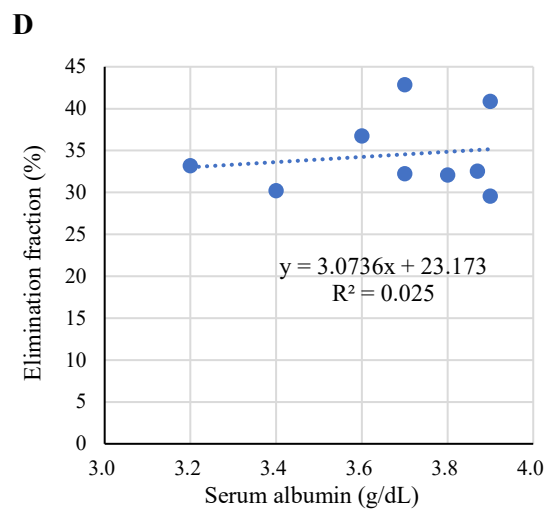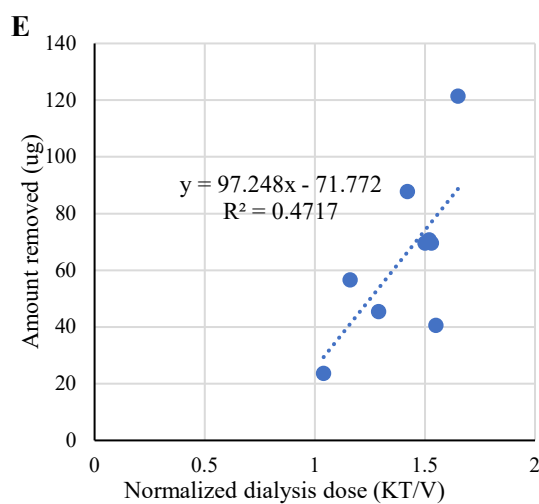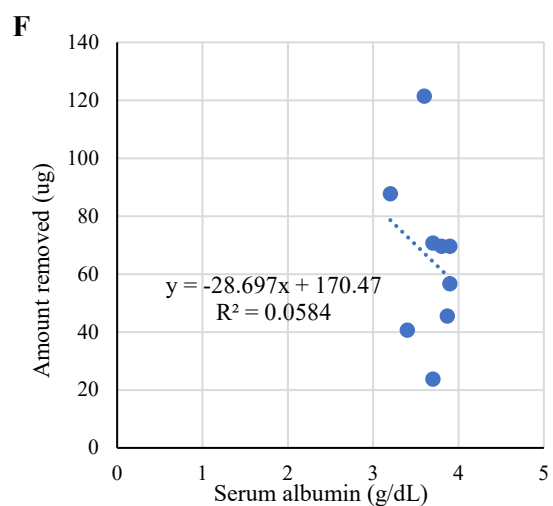

**Supplemental Figure S2**
